# Supplementary material
Source: PubMed Central journal article supplement (PMC7657071)
Supplement: 192_2020_4588_MOESM1_ESM.pdf [file 192_2020_4588_MOESM1_ESM.pdf]

**São Paulo, July 27<sup>th</sup>, 2020.**

To Journal Editorial Office of Springer.

Dears,

In the present study, the authors reviewed the use of digital practice for the treatment of pelvic floor disorders.

Digital practice was not allowed in most countries, but due to the COVID-19 pandemic, physiotherapy associations issued recommendations for providing physiotherapy via telehealth.

However, many physiotherapists are not qualified with the methodology to provide this type of assistance, especially in the rehabilitation of pelvic floor disorders.

As a result, the authors of this paper carried out a literature review on the proposed theme. However, due to the need to present a fast and urgent form of virtual assistance (to treat pelvic floor dysfunctions), we carried out the review in a very short period of time, which required the inclusion of one more author, for the division of the research stages in seven people, as follows:

**Kyannie Risame Ueda Da Mata, Rafaela Cristina Monica Costa and Fátima Fani Fitz:** literature search; selection of articles.

**Ébe dos Santos Monterio Carbone and Márcia Maria Gimenez:** data extraction; data synthesis.

**Maria Augusta Tezelli Bortollini and Rodrigo Aquino Castro:** evaluation of the quality of the evidence.

The other functions, already related in the article submission are:

**Kyannie Risame Ueda Da Mata** - Concept idea, research design, writing article, data collection, data analysis, project management.

**Rafaela Cristina Monica Costa** - Concept idea, research design, data collection, data analysis, project management.

**Ébe dos Santos Monterio Carbone** - Concept idea, research design, data collection, data analysis.

**Márcia Maria Gimenez** - Concept idea, research design, data collection, data analysis, review of manuscript before submitting

**Maria Augusta Tezelli Bortollini** – Concept idea, research design, writing article, review of manuscript before submitting

**Rodrigo Aquino Castro** - Concept idea, research design, writing article, review of manuscript before submitting

**Fátima Faní Fitz** - Concept idea, research design, writing article, review of manuscript before submitting, project management.

For the reasons above cited, we kindly ask you to keep the seven participants as authors of this paper.

Thank you for your attention

Kind Regards

*Kyannie Risame Ueda da Mata*

Kyannie Risame Ueda Da Mata
